# Supplementary material for: Suppression of the growth and metastasis of mouse melanoma by Taenia crassiceps and Mesocestoides corti tapeworms
Source: PubMed Central journal article supplement (PMC10987685; doi:10.3389/fimmu.2024.1376907), 2024-03-20
Supplement: Image_1.pdf [file Image_1.pdf]

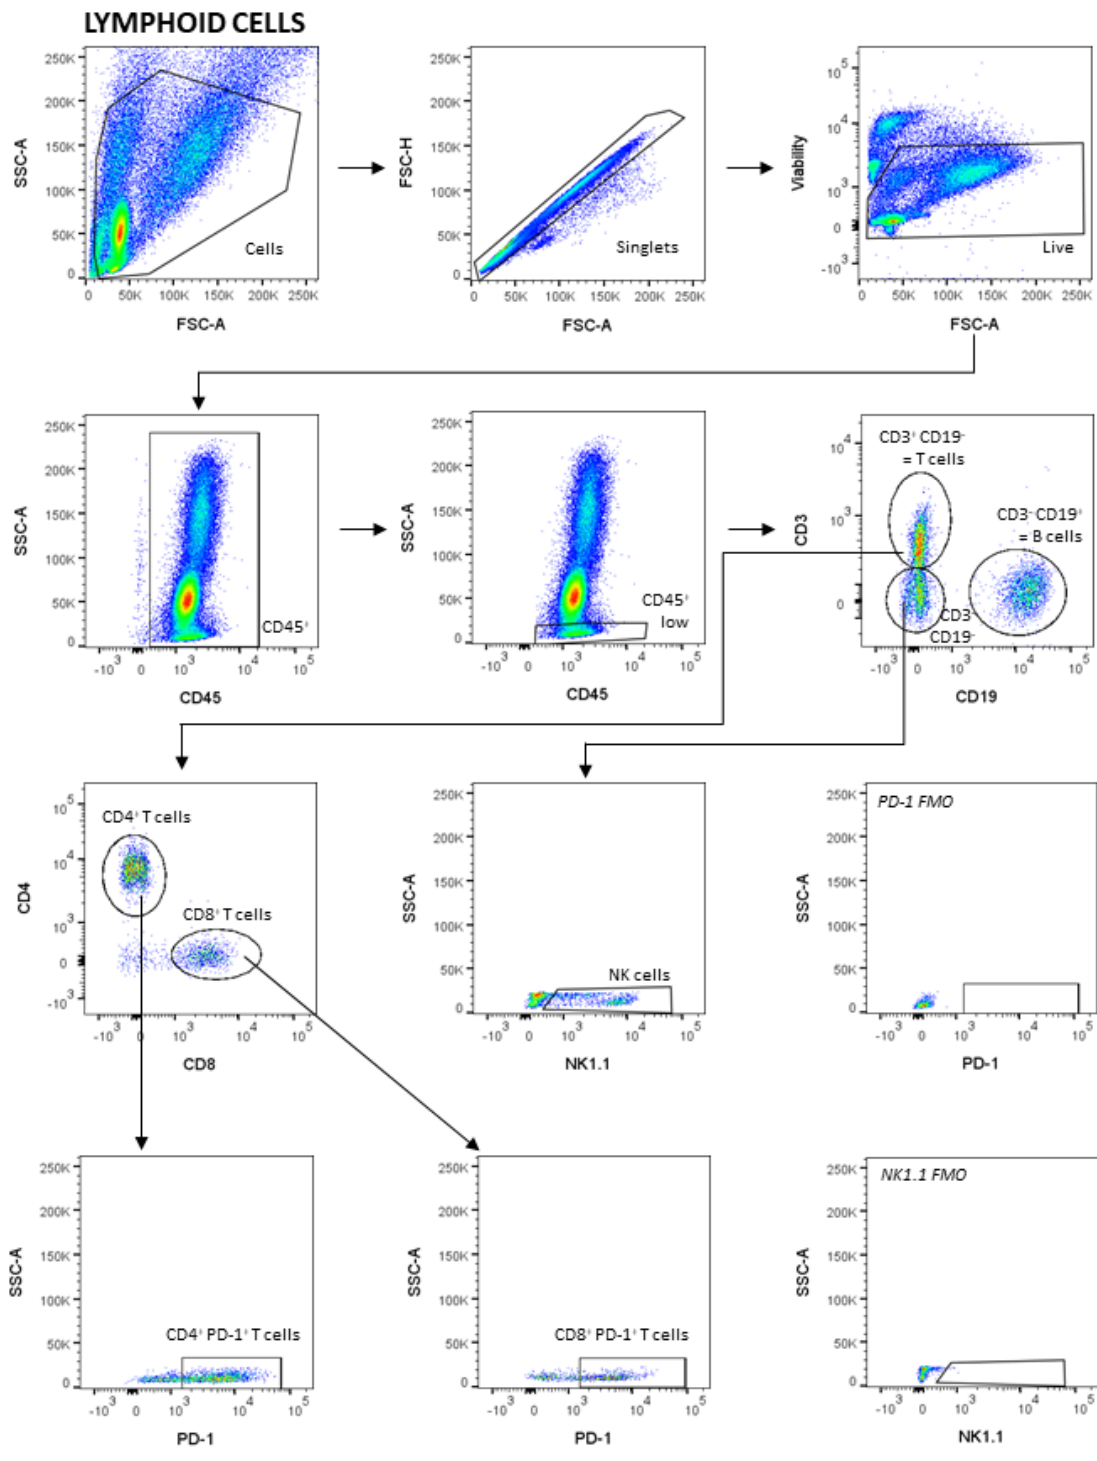

# MYELOID CELLS

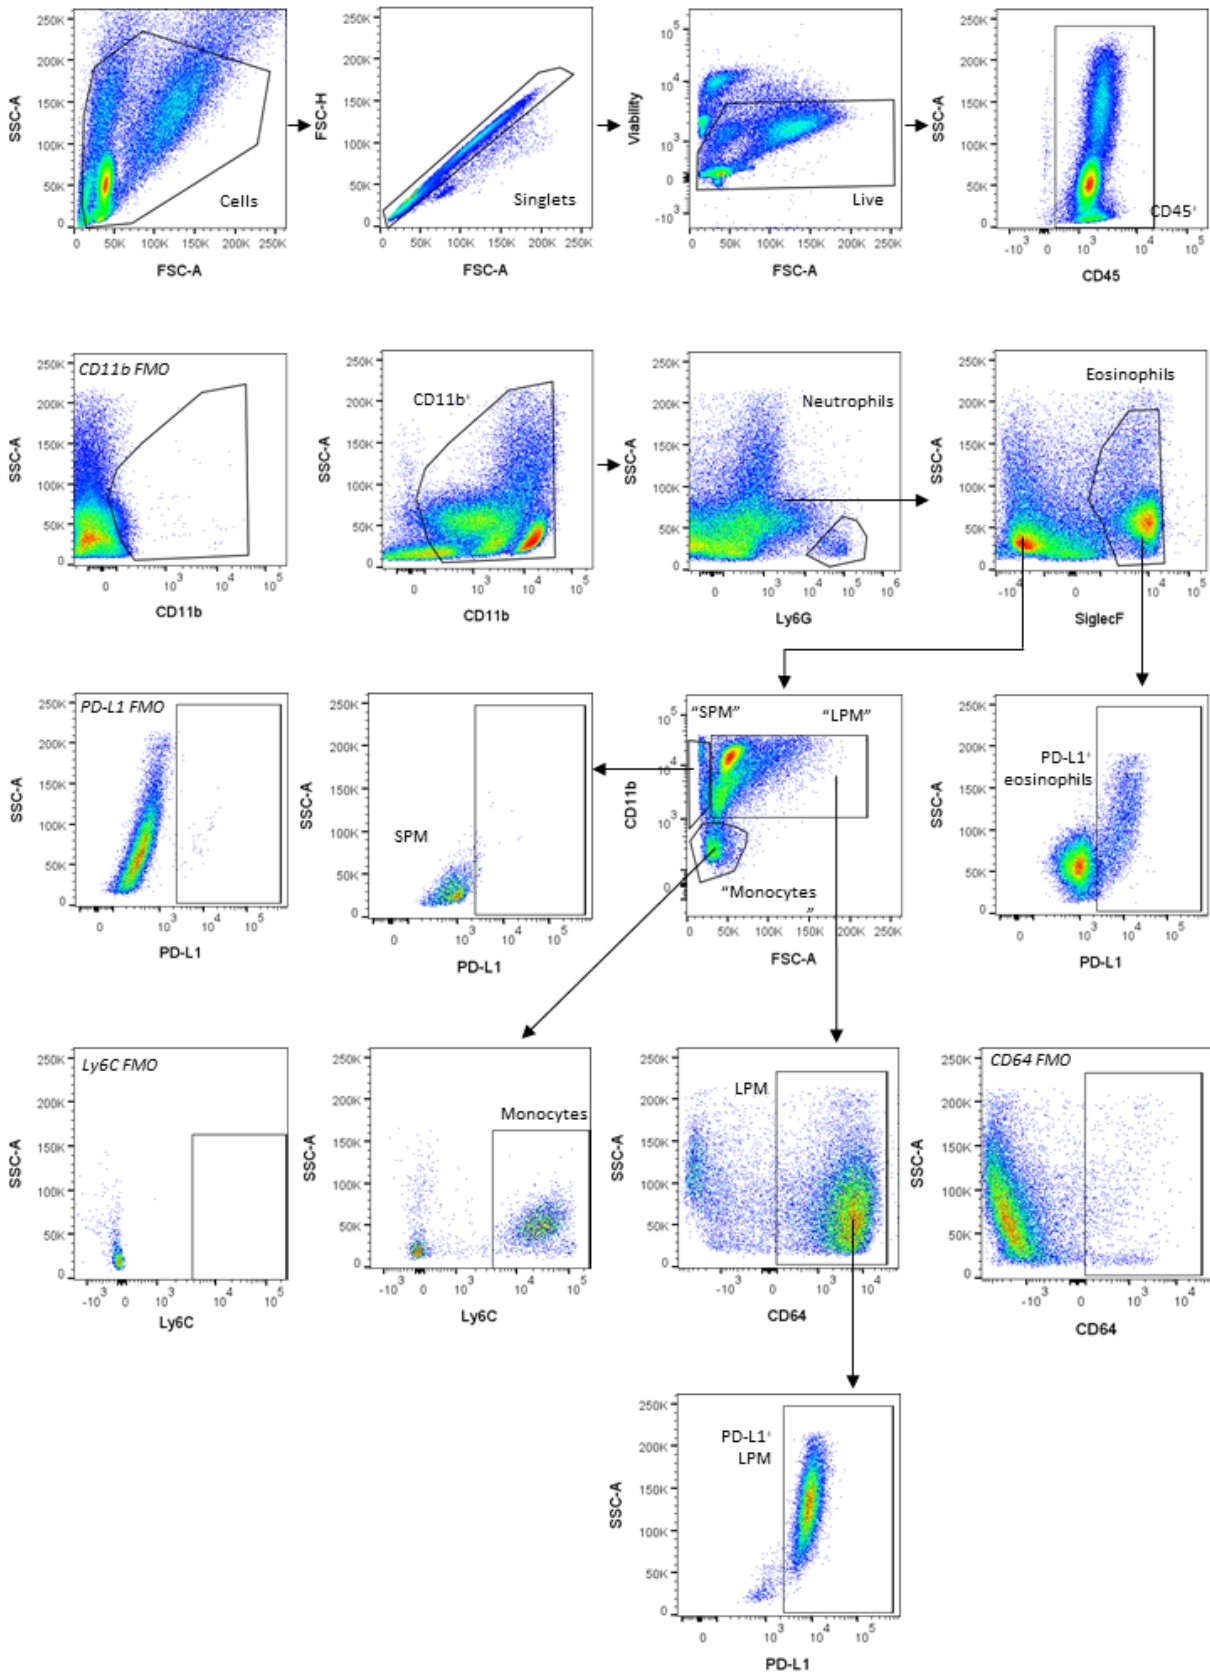

**SFig. 1. Representative gating strategy in the peritoneum with fluorescence minus one (FMO) controls.**
