# Supplementary material for: Suppression of the growth and metastasis of mouse melanoma by Taenia crassiceps and Mesocestoides corti tapeworms
Source: PubMed Central journal article supplement (PMC10987685; doi:10.3389/fimmu.2024.1376907), 2024-03-20
Supplement: Image_2.pdf [file Image_2.pdf]

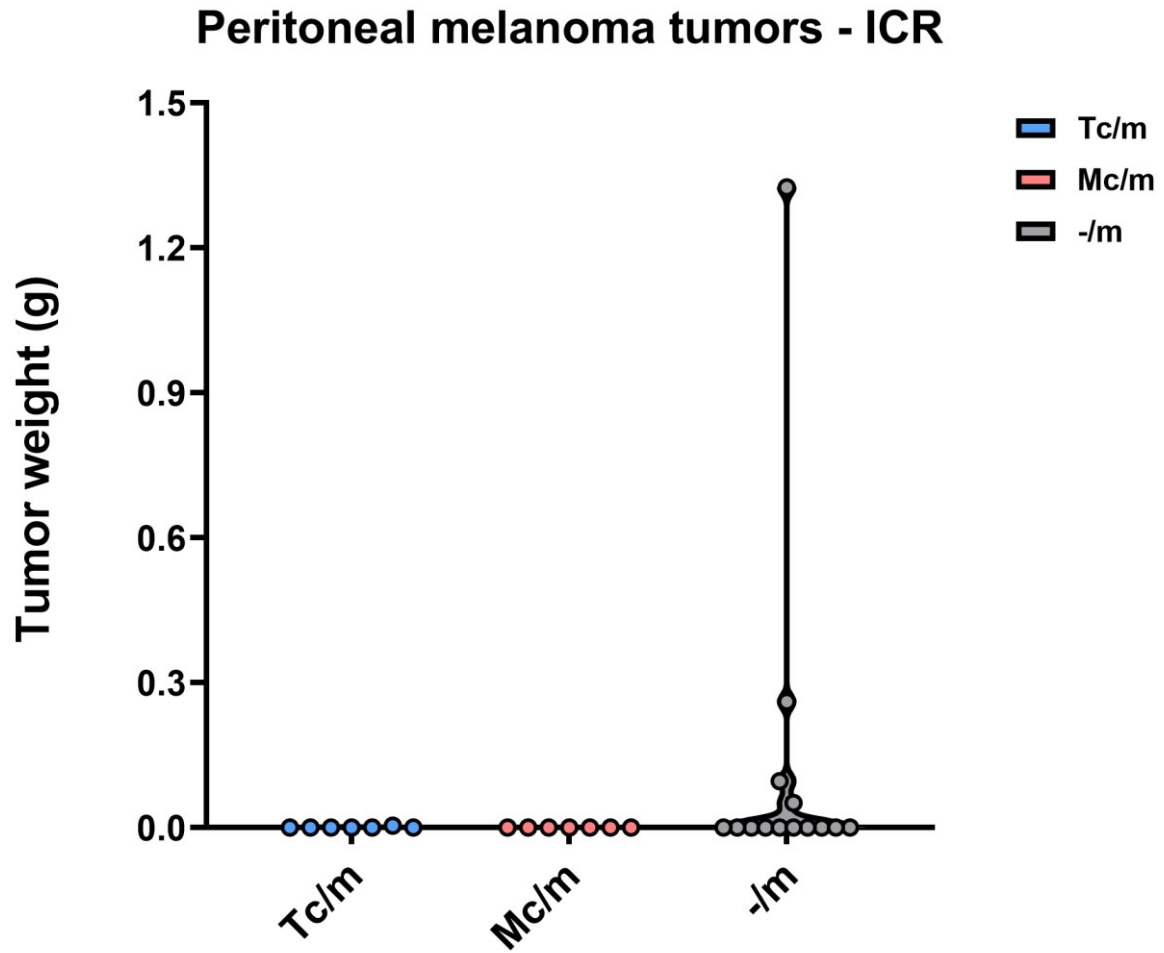

**SFig. 2. Melanoma tumor weight in the peritoneum of ICR mice.** The growth and weight of melanoma was very low even in non-infected ICR mice (n = 7) and, therefore, cannot provide suitable results for statistical analysis.
