# Supplementary material for: Suppression of the growth and metastasis of mouse melanoma by Taenia crassiceps and Mesocestoides corti tapeworms
Source: PubMed Central journal article supplement (PMC10987685; doi:10.3389/fimmu.2024.1376907), 2024-03-20
Supplement: Image_3.pdf [file Image_3.pdf]

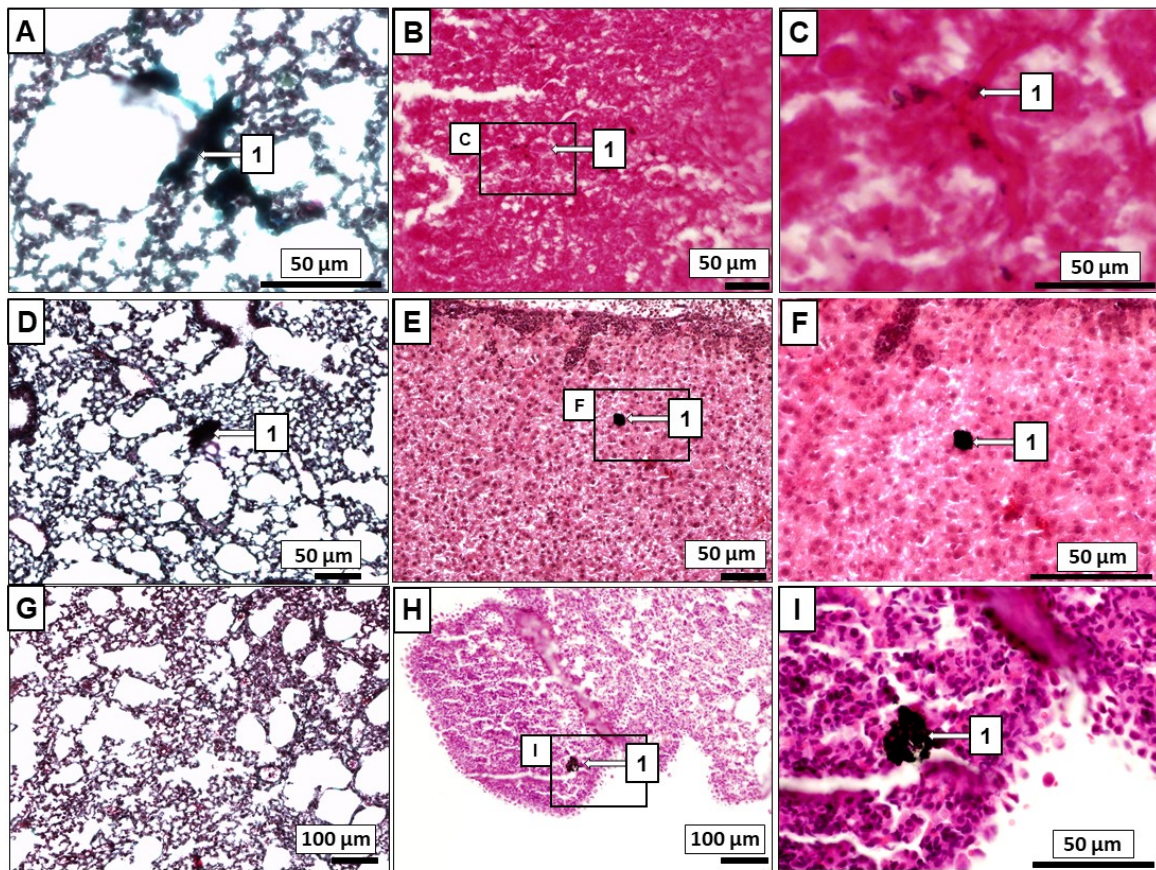

**SFig. 3. Histological evaluation of melanoma metastasis in C57BL/6J mice.** B16F10 cells (1) were found to invade the lungs (A) and the liver (B) of C57BL/6J mice without any tapeworm infection. In *T. crassiceps* infections, melanoma were also found in the lungs (D) and the liver (E), while in *M. corti* infections, they were only found in the liver (H), while the lungs were clear of them (G). Zoomed-in areas of the liver metastases (C, F, I).
