# Supplementary material for: Suppression of the growth and metastasis of mouse melanoma by Taenia crassiceps and Mesocestoides corti tapeworms
Source: PubMed Central journal article supplement (PMC10987685; doi:10.3389/fimmu.2024.1376907), 2024-03-20
Supplement: Image_4.pdf [file Image_4.pdf]

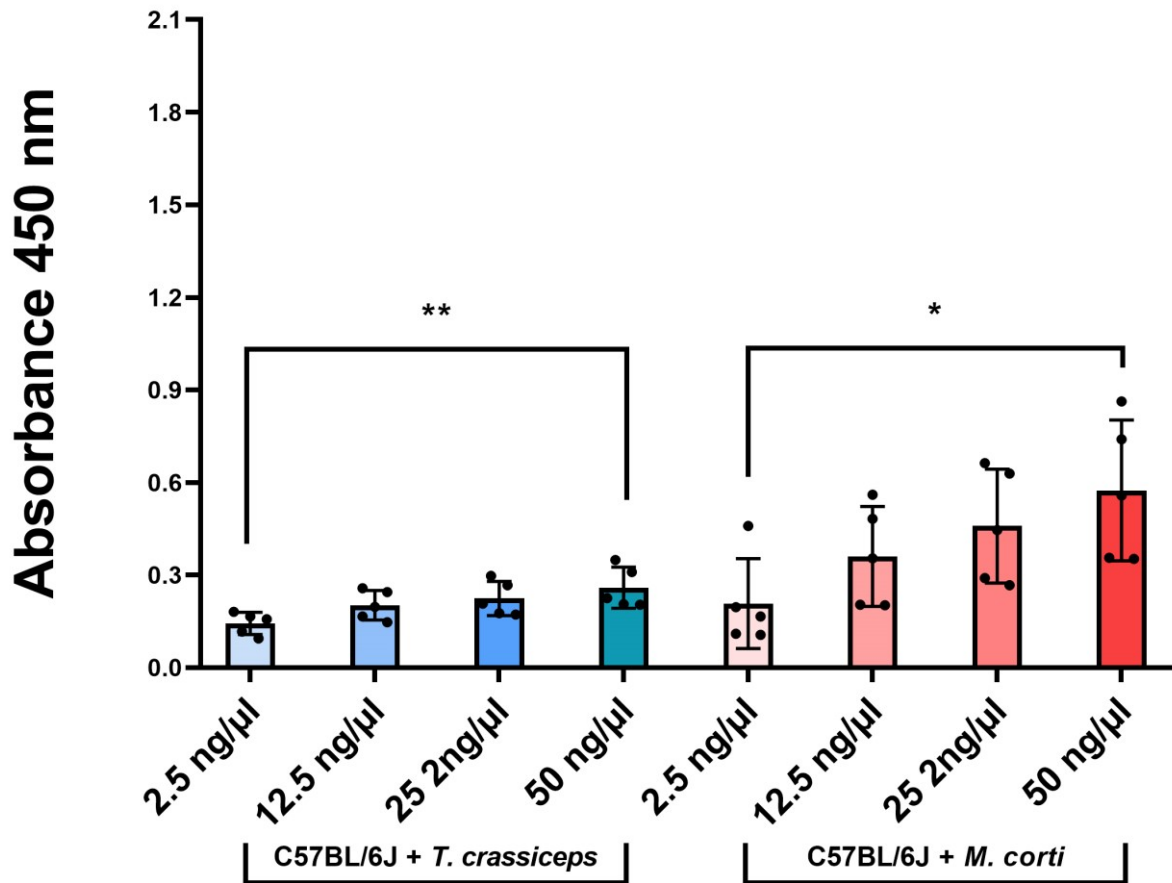

**SFig. 4. Titration of MelH antigen.** There was significant change in IgM binding to MelH only when the antigen concentration was increased 20x, showing that the IgM probably bound to the antigen only in a non-specific manner, after analysis with Kruskal-Willis test with Dunn's multiple comparisons. C57BL/6J mouse sera were tested (n = 5), infected with either *T. crassiceps* or *M. corti*.
