# Supplementary material for: Suppression of the growth and metastasis of mouse melanoma by Taenia crassiceps and Mesocestoides corti tapeworms
Source: PubMed Central journal article supplement (PMC10987685; doi:10.3389/fimmu.2024.1376907), 2024-03-20
Supplement: Image_5.pdf [file Image_5.pdf]

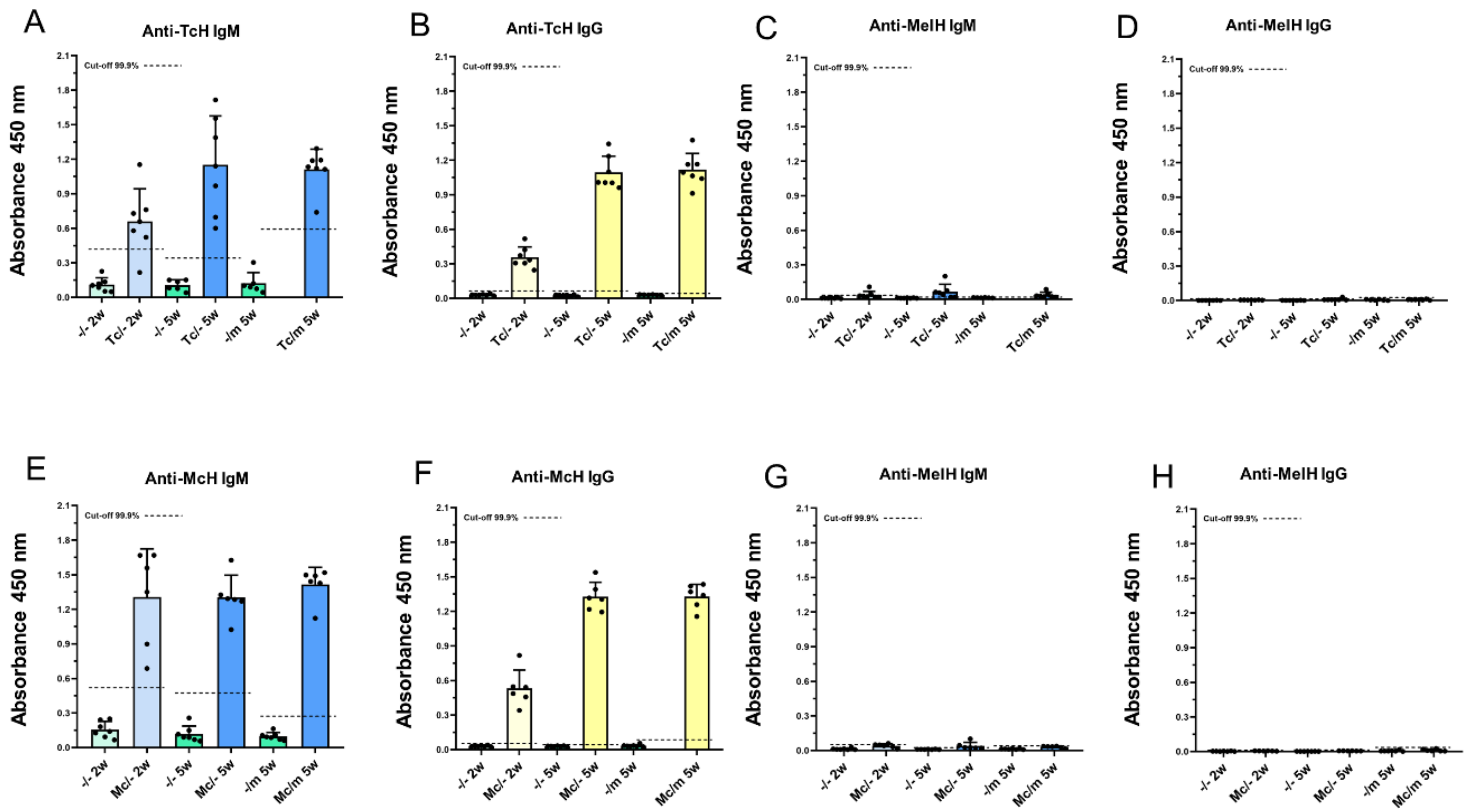

**SFig. 5. Antibody response to tapeworm and melanoma antigens of ICR mice infected with *T. crassiceps* and *M. corti*.** Here, the mouse strains and infections are as follows: **A – D** ICR mice infected with *T. crassiceps*, **E – F** ICR mice infected with *M. corti*. Sera of all infected mice contained high levels of specific IgM (**A, E**) and IgG (**B, F**) raised against the antigens of the respective tapeworm, while they did not contain any significant amount of IgM (**C, G**) or IgG (**D, H**) specific to MelH. (n = 7) The cut-off values were determined according to Frey et al. (1998).
