# Supplementary material for: Suppression of the growth and metastasis of mouse melanoma by Taenia crassiceps and Mesocestoides corti tapeworms
Source: PubMed Central journal article supplement (PMC10987685; doi:10.3389/fimmu.2024.1376907), 2024-03-20
Supplement: Image_6.pdf [file Image_6.pdf]

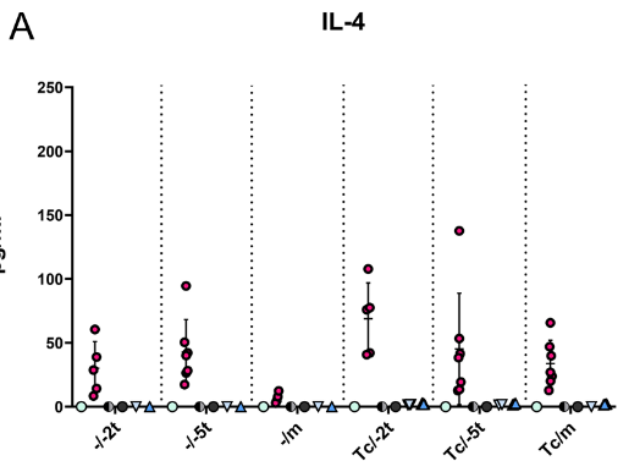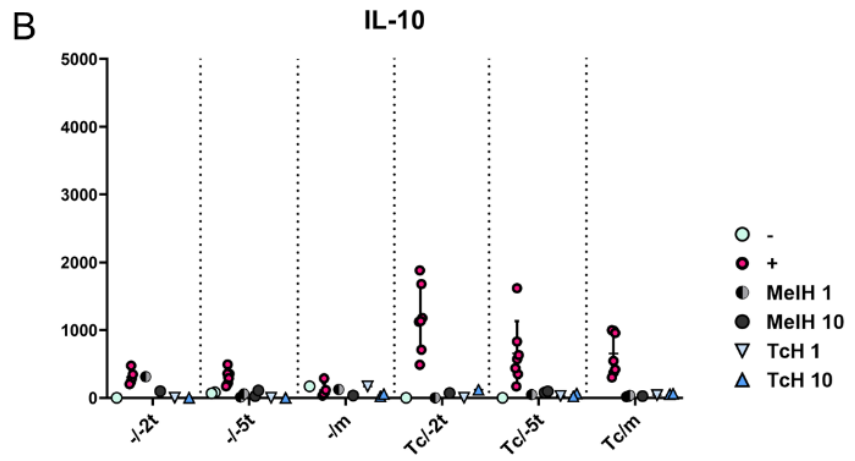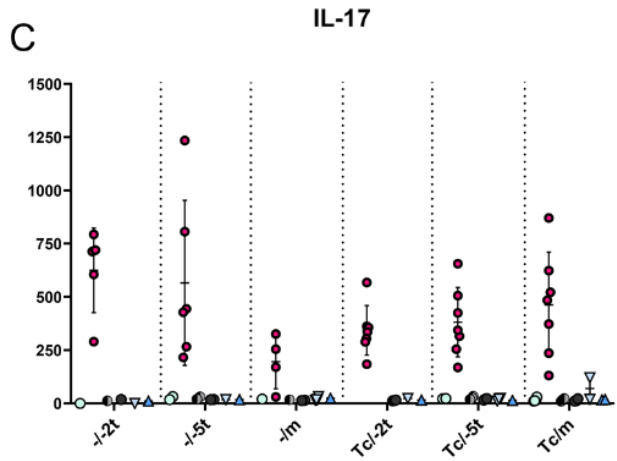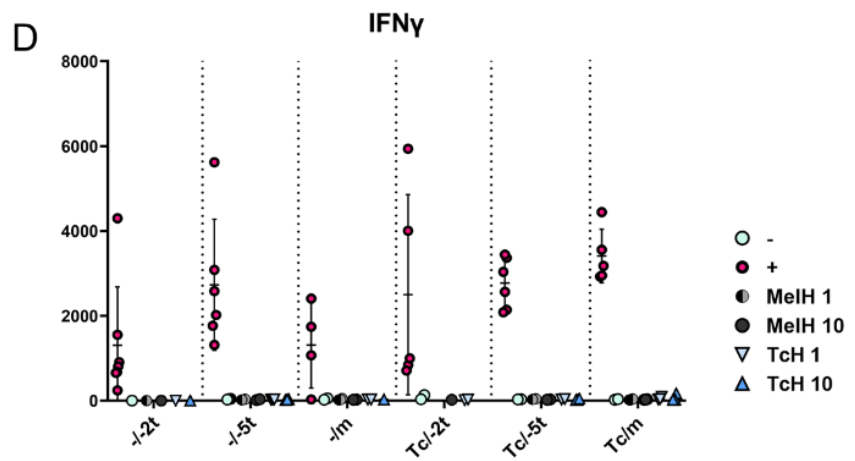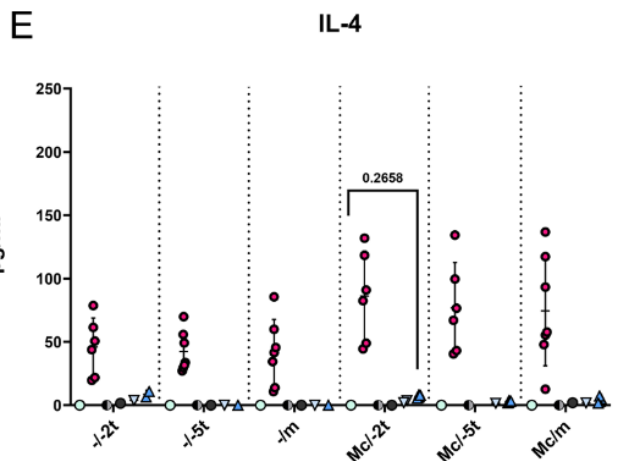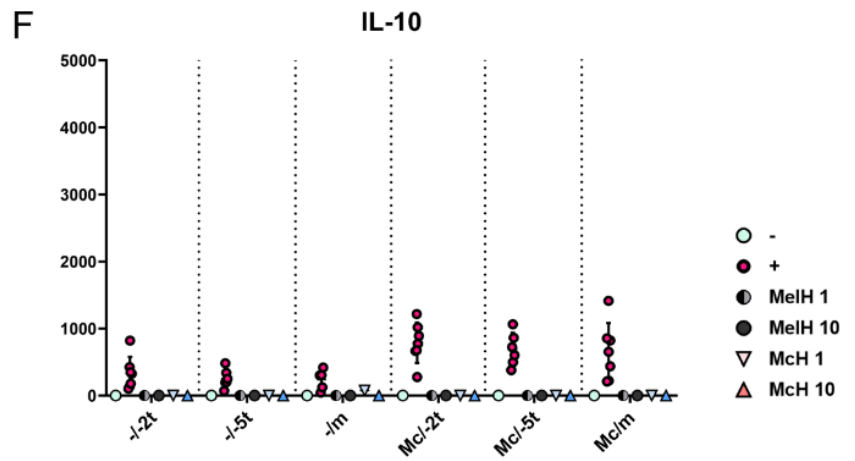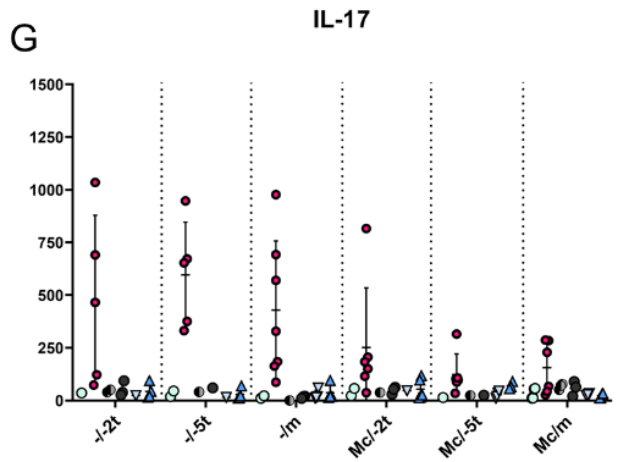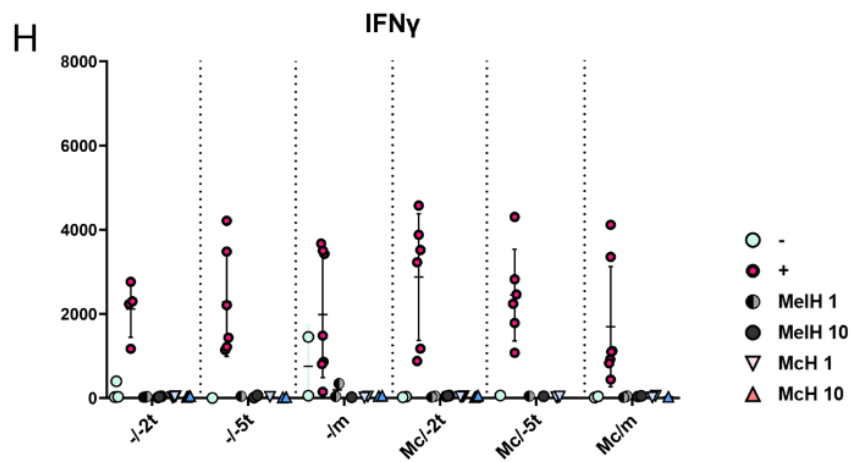

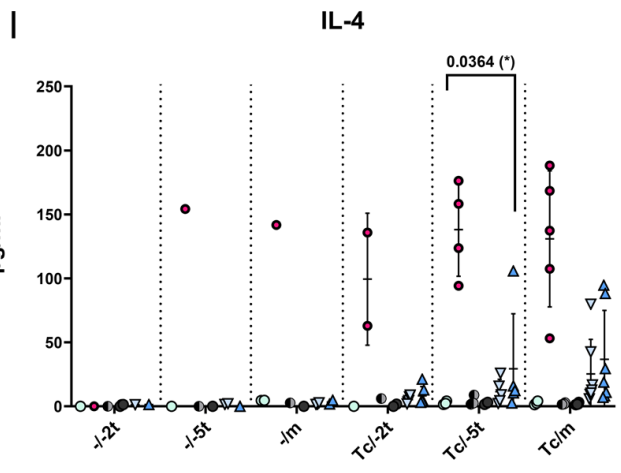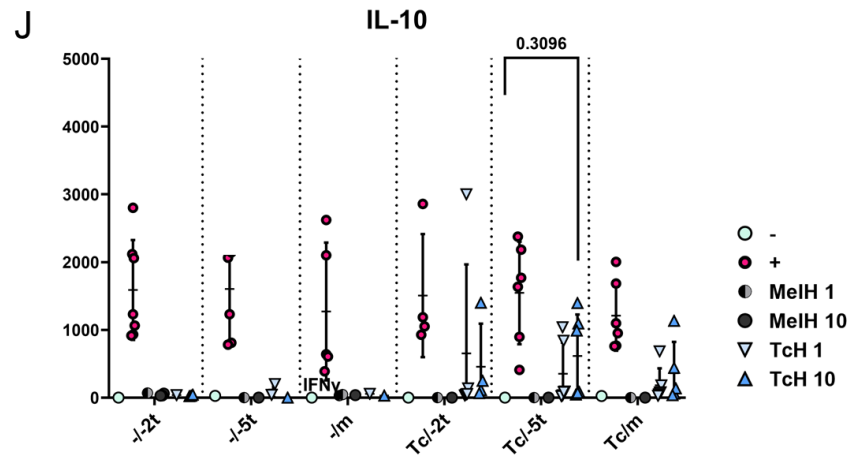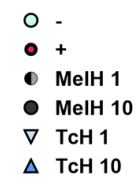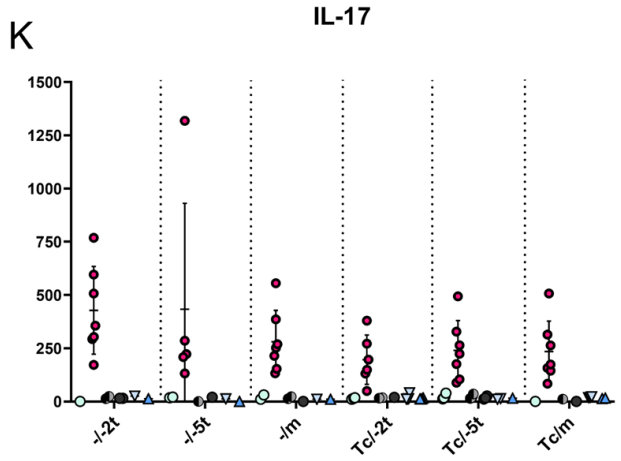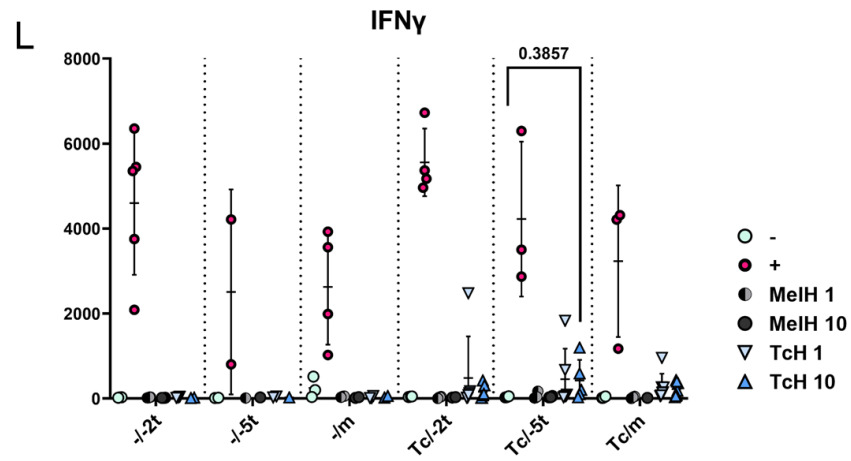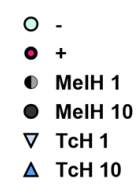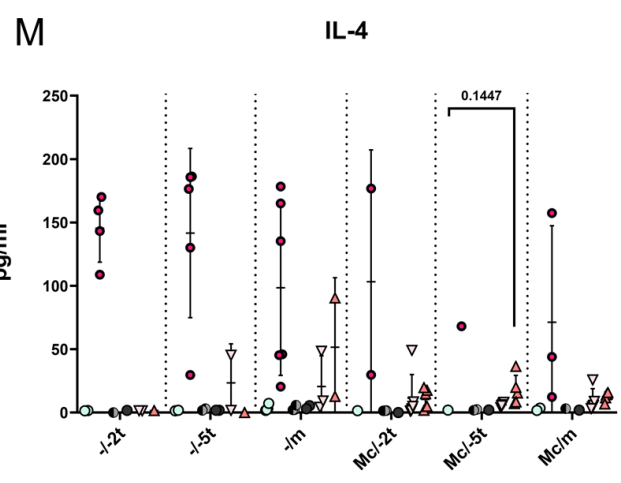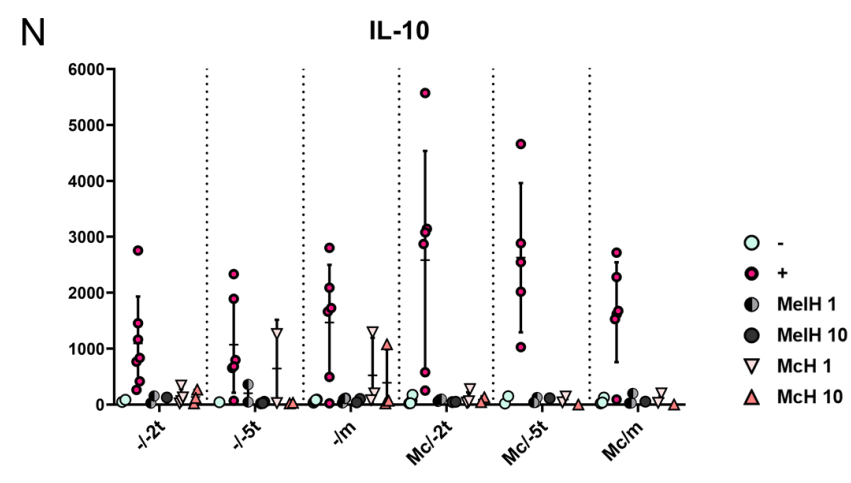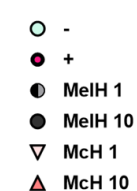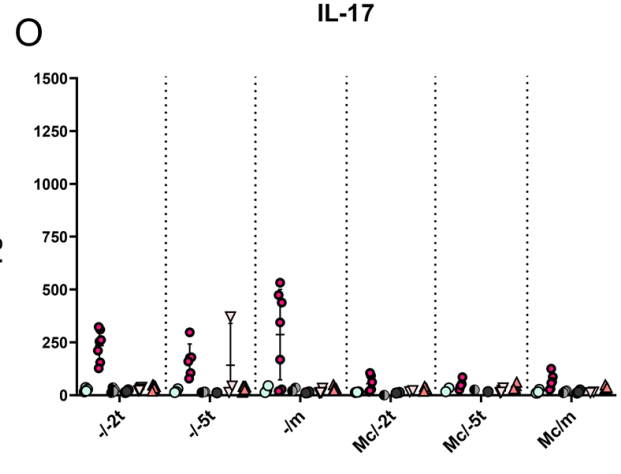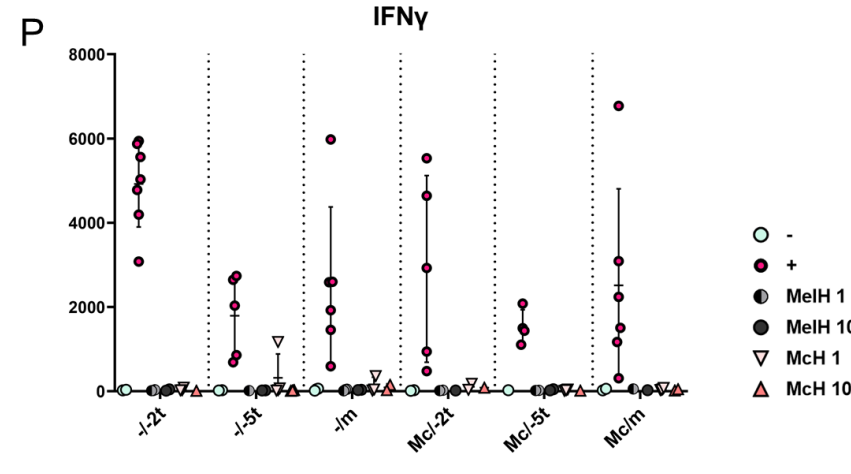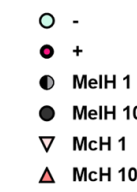

**SFig. 6. Cytokines produced by restimulated splenocytes.** Cytokine production by splenocytes restimulated with tapeworm homogenate or melanoma homogenate (n = 7). **A – D** are C57BL/6J mice infected with *T. crassiceps*, **E – H** are C57BL/6J mice infected with *M. corti*, **I – L** are ICR mice infected with *T. crassiceps* and **M – P** are ICR mice infected with *M. corti*. Values below detection limit and those above the calibration curve are omitted. – represents control, + concanavalin, MelH 1 and MelH 10 represent 1 and 10 µg/ml of melanoma cell homogenate, TcH 1 and TcH 10 then 1 and 10 µg/ml of *T. crassiceps* homogenate, McH 1 and McH 10 *M. corti* homogenate. -/- 2t and 5t are control mice of age equivalent to mice 2 or 5 weeks post tapeworm infection, -/m are mice with only melanoma, Tc or Mc/- 2t and Tc or Mc/- 5t are mice with only tapeworms, 2 or 5 weeks post infection and Tc or Mc/m are mice with both tapeworms and melanoma. Statistical analysis was performed with Kruskal-Willis test with Dunn's multiple comparisons test.
